# Supplementary material for: Peripapillary Intravitreal Injection Improves AAV-Mediated Retinal Transduction
Source: PubMed Central journal article supplement — Mol Ther Methods Clin Dev. 2020 Mar 30;17:647–56. doi: 10.1016/j.omtm.2020.03.018 (PMC7152690; doi:10.1016/j.omtm.2020.03.018), 2020-03-30
Supplement: mmc1.pdf [file mmc1.pdf]

**OMTM, Volume 17**

**Supplemental Information**

**Peripapillary Intravitreal Injection Improves**

**AAV-Mediated Retinal Transduction**

**Sanjar Batirovich Madrakhimov, Jin Young Yang, Dong Hyuck Ahn, Jung Woo Han, Tae Ho Ha, and Tae Kwann Park**

*Peripapillary injection for AAV transduction*

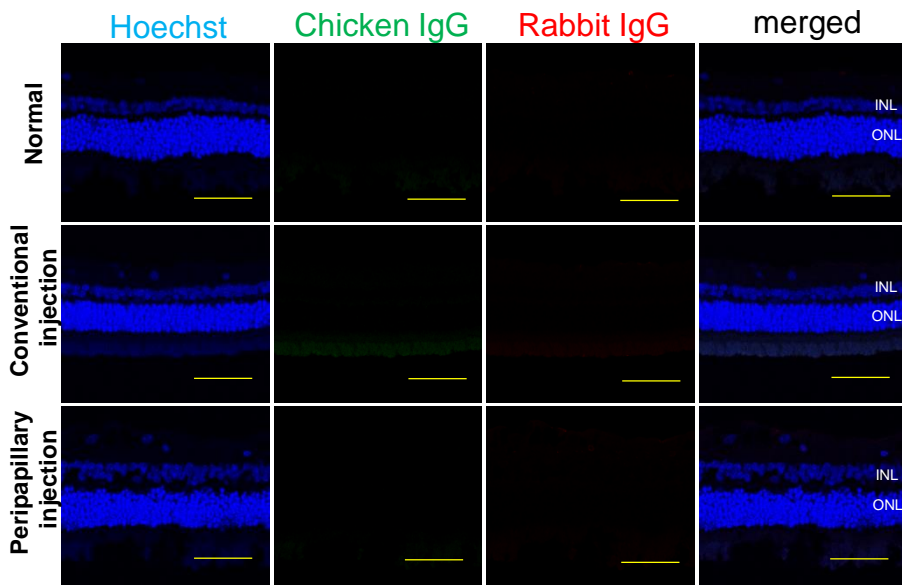

**Figure S1. Negative controls for immunofluorescence assay. Scale bars = 50 $\mu$ m**
